# Supplementary material for: Integrated transgene and transcriptome reveal the molecular basis of MdWRKY87 positively regulate adventitious rooting in apple rootstock
Source: Front Plant Sci. 2023 Jan 26;14:1136616. doi: 10.3389/fpls.2023.1136616 (PMC9909196; doi:10.3389/fpls.2023.1136616)
Supplement: Supplementary file 2 [file Table_1.xlsx]

## Sheet: Supplemental Table S1
Supplemental Table S1 PCR primers of genes
Primer name	DNA sequence (5’-3’)	Description
MdWRKY87-qRT-PCR_F	CTATTCTTGCCTCCTCCATA	qRT-PCR analysis of MdWRKY87 expression
MdWRKY87-qRT-PCR_R	GTTCTGATTCTTCGTGCTTA
proMdWRKY87_F	AGCAGATGGTGATGAGAAATAGG	promoter clone of MdWRKY87 gene
proMdWRKY87_R	AGAGAGAGAGAGAGAGAGAGAGA
MdWRKY87_CDS_F	CGCGGATCCATGGAGAACTGGGATTTGCAA	Generating the pSuper:MdWRKY87_CDS-GFP construct
MdWRKY87_CDS_R	TCCCCCGGGTCCTCTTTCCAAGAATTTCGC
MdWRKY87-CDS-Infusion-F	catggaggccgaattcATGGAGAACTGGGATTTGCAA	Generating the GAL4-BD-MdWRKY87_CDS construct
MdWRKY87-CDS-Infusion-R	gcaggtcgacggatccTCCTCTTTCCAAGAATTTCGC
MdWRKY87-CDS-pBDVP16-F	tatcgataccgtcgaAATGCCAACTTTGTACAAAAAAGC	Generating the GAL4-BD-MdWRKY87_CDS-VP16 construct
MdWRKY87-CDS-pBDVP16-R	ccccctcgaggtcgaTTAATGCCAACTTTGTACAAGAAAGC
MdWRKY87-CDS_pRI101_F	ccgtcgaccccggggATGCCAACTTTGTACAAAAAAGC	Generating the MdWRKY87 overexpression construct
MdWRKY87-CDS_pRI101_R	gatcggggaaattcgTAATGCCAACTTTGTACAAGAAAGC
NtWOX11-qRT-PCR_F	GAATCCAAAGCCGGAACAAATC	qRT-PCR analysis of gene relative expression level
NtWOX11-qRT-PCR_R	CGTATTCTCACCGTCTCATCTTT
NtAUX/IAA16-qRT-PCR_F	GATGGTGCACCTTACCTTAGAA
NtAUX/IAA16-qRT-PCR_R	GAAGGAACTGAACATGTTGGATAAG
NtAUX/IAA5-qRT-PCR_F	CATGATGAGGAGGAGGGATAGT
NtAUX/IAA5-qRT-PCR_R	TCAACTCCTTCACTGCCATTT
NtARR12-qRT-PCR_F	GTTCGTCGGCACTCATACA
NtARR12-qRT-PCR_R	TGTTGGCTCCAAGAGGTAATC
NtAUX/IAA27-qRT-PCR_F	TGGGTGAAGATTGTGGCTTTAT
NtAUX/IAA27-qRT-PCR_R	CAGCCTCTTTCACAGCATTAGA
NtAIL-qRT-PCR_F	GGCGTCAAGGTGGATATGATAAG
NtAIL-qRT-PCR_R	GGAAACAGGGAAGTTGGTTGTA
